# Supplementary material for: Effect of Gap Size and Elevation on the Regeneration and Coexistence of Abies, Betula, and Acer Tree Species in a Subalpine Coniferous Forest
Source: MDPI journal article supplement (doi:10.3390/f14102099), 2023-10-19
Supplement: s1 [file s1]

**Table S1.** Mean environmental factors in different gap sizes from 3000 to 3500 m.

| Elevation | Gap Size   | PPFD_C | PPFD_O | AMT  | DAMT | GST   | NGST  | AH    | ST10 | ST20 | SC10  | SC20 | SN10 | SN20 | SCN10 | SCN20 |
|-----------|------------|--------|--------|------|------|-------|-------|-------|------|------|-------|------|------|------|-------|-------|
| 3000–3100 | Large gap  | 546.00 | 274.00 | 2.80 | 3.88 | 17.91 | −9.77 | 90.47 | 3.52 | 3.85 | 22.56 | 7.94 | 0.69 | 0.45 | 32.58 | 17.69 |
|           | Medium gap | 419.00 | 261.33 | 2.29 | 5.17 | 19.06 | −5.19 | 93.18 | 3.31 | 3.55 | 14.89 | 9.57 | 0.68 | 0.45 | 21.08 | 21.21 |
|           | Small gap  | 359.33 | 249.00 | 2.56 | 4.87 | 17.51 | −6.18 | 93.97 | 3.30 | 3.30 | 9.26  | 8.10 | 0.52 | 0.42 | 18.05 | 19.28 |
|           | Understory | 53.33  | 41.67  | 2.72 | 4.45 | 17.51 | −5.62 | 93.41 | 3.65 | 3.70 | 8.47  | 7.36 | 0.50 | 0.48 | 16.87 | 15.41 |
| 3100–3200 | Large gap  | 563.33 | 281.33 | 2.13 | 3.76 | 16.47 | −9.31 | 92.58 | 2.85 | 3.10 | 12.12 | 7.67 | 0.58 | 0.40 | 21.22 | 19.08 |
|           | Medium gap | 427.00 | 254.67 | 1.96 | 4.72 | 17.56 | −6.28 | 93.54 | 2.91 | 3.12 | 7.93  | 8.83 | 0.55 | 0.43 | 14.37 | 20.44 |
|           | Small gap  | 366.00 | 248.00 | 2.17 | 4.78 | 16.72 | −6.82 | 93.48 | 2.84 | 2.84 | 4.48  | 7.15 | 0.42 | 0.40 | 10.56 | 17.66 |
|           | Understory | 50.67  | 43.00  | 2.33 | 4.36 | 17.25 | −6.51 | 93.29 | 2.79 | 2.84 | 6.91  | 6.76 | 0.38 | 0.35 | 18.52 | 19.83 |
| 3200–3300 | Large gap  | 580.00 | 281.33 | 2.09 | 3.67 | 15.60 | −8.42 | 93.45 | 2.35 | 2.56 | 9.06  | 6.98 | 0.47 | 0.40 | 19.07 | 17.66 |
|           | Medium gap | 441.00 | 261.00 | 1.91 | 4.16 | 15.67 | −7.58 | 93.80 | 2.39 | 2.57 | 8.15  | 7.90 | 0.44 | 0.39 | 18.97 | 20.09 |
|           | Small gap  | 376.33 | 253.33 | 2.02 | 4.71 | 15.72 | −7.38 | 92.91 | 2.36 | 2.36 | 7.90  | 5.55 | 0.34 | 0.35 | 23.57 | 15.70 |
|           | Understory | 57.33  | 49.00  | 1.45 | 4.46 | 16.37 | −7.07 | 92.54 | 2.24 | 2.30 | 6.51  | 6.25 | 0.33 | 0.31 | 19.51 | 20.34 |
| 3300–3400 | Large gap  | 590.33 | 275.67 | 1.85 | 3.56 | 14.18 | −8.69 | 93.48 | 1.89 | 2.04 | 8.77  | 6.54 | 0.38 | 0.39 | 23.55 | 16.52 |
|           | Medium gap | 450.67 | 262.33 | 1.69 | 3.68 | 14.17 | −8.89 | 94.63 | 1.95 | 2.09 | 7.95  | 6.11 | 0.36 | 0.37 | 22.40 | 16.54 |
|           | Small gap  | 379.67 | 248.00 | 1.90 | 4.62 | 14.98 | −8.14 | 92.65 | 2.02 | 2.02 | 5.72  | 4.62 | 0.33 | 0.30 | 17.58 | 15.33 |
|           | Understory | 57.67  | 51.00  | 1.42 | 4.38 | 16.39 | −8.64 | 93.60 | 1.89 | 1.98 | 6.24  | 5.94 | 0.24 | 0.21 | 26.35 | 28.02 |
| 3400–3500 | Large gap  | 616.67 | 274.00 | 1.19 | 3.49 | 13.52 | −8.28 | 91.58 | 1.36 | 1.46 | 5.49  | 6.17 | 0.38 | 0.38 | 14.28 | 16.36 |
|           | Medium gap | 465.00 | 256.33 | 1.42 | 3.26 | 12.71 | −9.88 | 94.82 | 1.59 | 1.70 | 6.78  | 6.12 | 0.28 | 0.34 | 23.62 | 17.73 |
|           | Small gap  | 388.67 | 240.00 | 1.39 | 4.56 | 14.23 | −8.51 | 92.30 | 1.51 | 1.51 | 6.21  | 3.93 | 0.31 | 0.22 | 21.25 | 18.00 |
|           | Understory | 55.33  | 52.67  | 0.71 | 4.46 | 14.37 | −8.56 | 93.66 | 1.54 | 1.60 | 5.27  | 4.95 | 0.20 | 0.18 | 27.11 | 28.46 |

RD\_Ab\_se = *Abies* seedling regeneration density; RD\_Ab\_sa = *Abies* sapling regeneration density; RD\_Ab\_st = *Abies* small tree regeneration density; RD\_Be\_se = *Betula* seedling regeneration density; RD\_Be\_sa = *Betula* sapling regeneration density; RD\_Be\_st = *Betula* small tree regeneration density; RD\_Ac\_se = *Acer* seedling regeneration density; RD\_Ac\_sa = *Acer* sapling regeneration density; RD\_Ac\_st = *Acer* small tree regeneration density; PPFD\_C = photosynthetic photon flux density on Cloudless days; PPFD\_O = photosynthetic photon flux density on overcast days; AMT = air annual mean temperature; DAMT = annual average temperature difference between day and night; GST = annual mean temperature of growing season; NGST = annual mean temperature of non-growing season; AH = air relative humidity; ST10 = soil temperature (0–10cm); ST20 = soil temperature (10–20cm); SC10 = soil total C (0–10cm); SC20 = soil total C (10–20cm); SN10 = soil total N (0–10cm); SN20 = soil total N (10–20cm); SCN10 = soil C/N ratio (0–10cm); SCN20 = soil C/N ratio (10–20cm).
